# Supplementary material
Source: PubMed Central journal article supplement (PMC2556439)
Supplement: mmc1.pdf [file mmc1.pdf]

Supplemental Data

A Genome-wide Analysis of Admixture in Uyghurs and  
a High-Density Admixture Map for Disease-Gene Discovery

Shuhua Xu and Li Jin

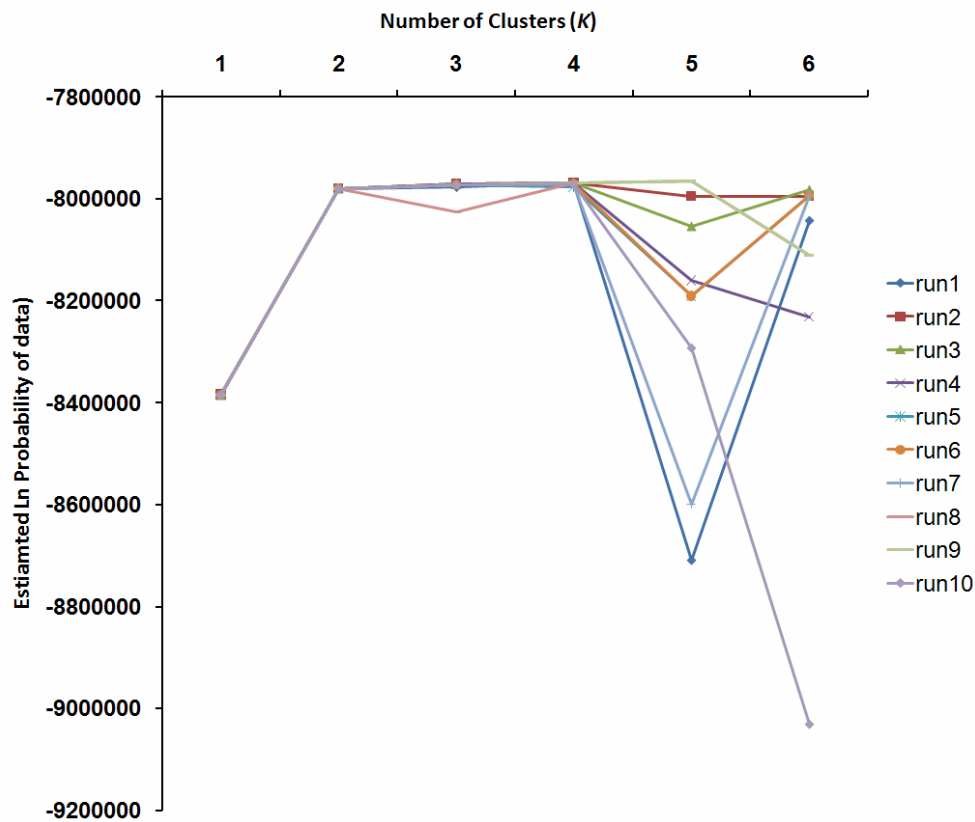

Figure S1 Probability Estimations for the Number of Clusters, with Ten Repeats for Each  $K$

The ordinate shows the Ln probability corresponding to the number of clusters ( $K$ ) shown on the abscissa.

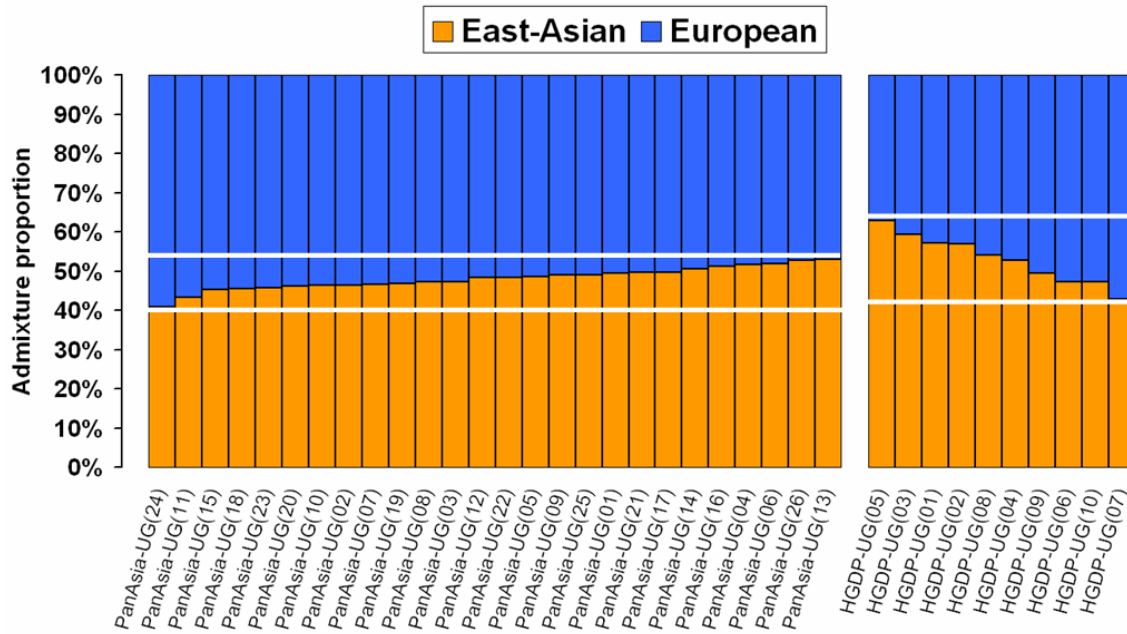

**Figure S2 Summary Plot of Individual Admixture Proportions**

The results of individual admixture proportions estimated from 19,934 SNPs. Each individual is represented by a single vertical line broken into 2 colored segments, with lengths proportional to each of the 2 inferred clusters, orange indicates East-Asian ancestry proportion, and blue indicates European ancestry proportion. The ordinate indicates the proportion unit. The individual IDs are presented at the bottom of the plot.

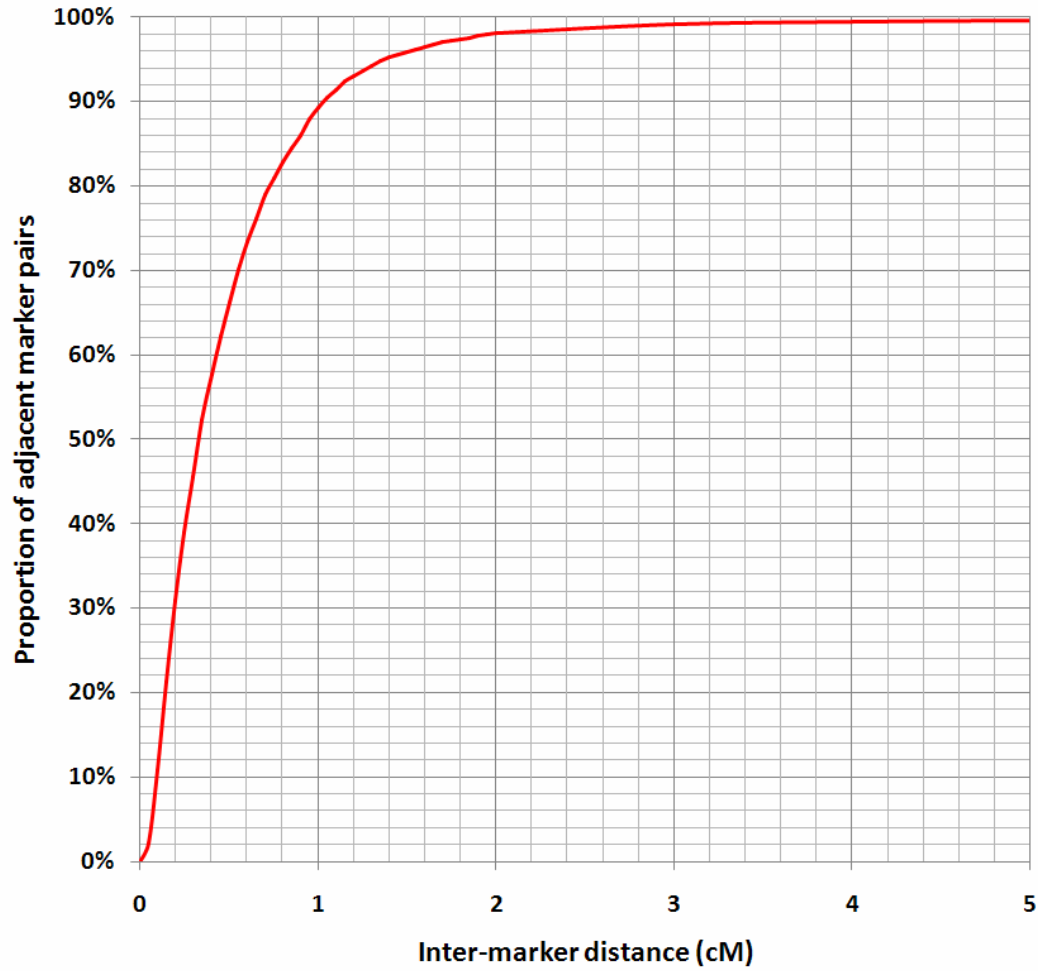

**Figure S3 The Distribution of Intermarker Distance**

The average intermarker distance is 0.50 cM and the median is 0.33 cM, with 66.3% of adjacent marker pairs having intermarker distance less than 0.5 cM, 89.3% less than 1 cM, and 98% less than 2 cM.

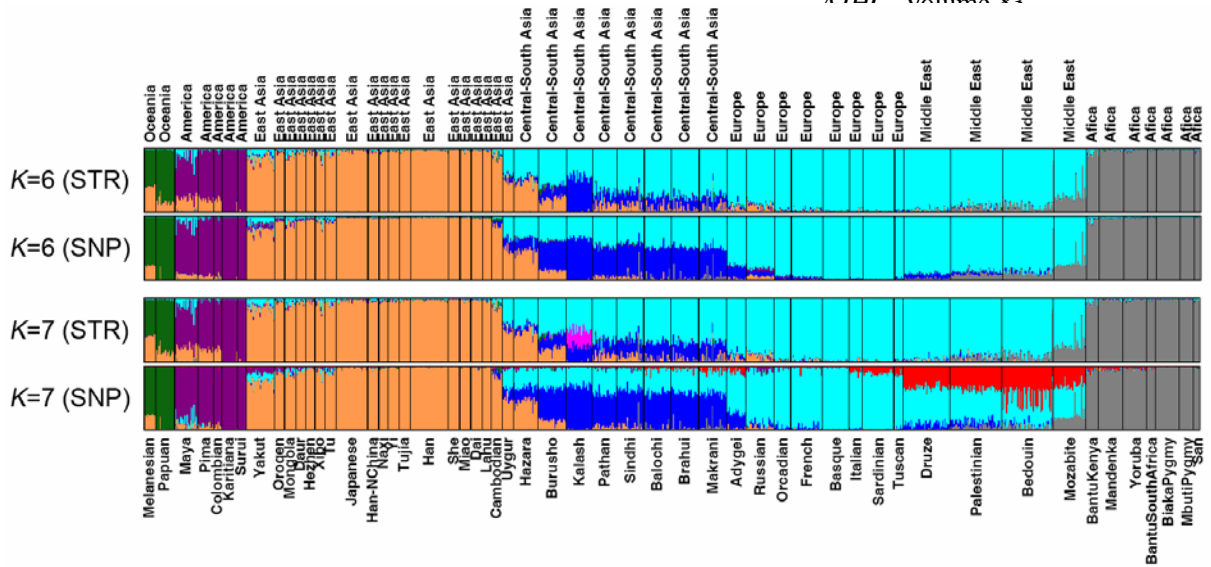

**Figure S4 Summary Plot of Individual Admixture Proportions**

STRUCTURE analysis was performed with STR and SNP data separately in 940 individuals. The results of K=6 and K=7 are displayed, which match that of Li et al.<sup>1</sup>

Table S1. Summary of SNP-Screen Results for Excluded SNPs with  $F_{ST} > 0.05$  between EAS Populations

|            | Mongola | JPT   | Japanese | Han  | CHB  |
|------------|---------|-------|----------|------|------|
| Mongola    |         |       |          |      |      |
| JPT        | 14475   |       |          |      |      |
| Japanese   | 14000   | 2049  |          |      |      |
| Han        | 13245   | 4627  | 4995     |      |      |
| CHB        | 12426   | 3036  | 3957     | 1752 |      |
| Han-NChina | 11499   | 10276 | 10430    | 8163 | 7757 |

Table S2. Summary of SNP-Screen Results for Excluded SNPs with  $F_{ST} > 0.05$  between EUR Populations

|           | Basque | Sardinian | Italian | Tuscan | French | Orcadian | CEU   | Adygei |
|-----------|--------|-----------|---------|--------|--------|----------|-------|--------|
| Basque    |        |           |         |        |        |          |       |        |
| Sardinian | 8682   |           |         |        |        |          |       |        |
| Italian   | 9087   | 8391      |         |        |        |          |       |        |
| Tuscan    | 11157  | 10786     | 9682    |        |        |          |       |        |
| French    | 6666   | 7022      | 6426    | 9120   |        |          |       |        |
| Orcadian  | 10438  | 11060     | 9866    | 11068  | 6678   |          |       |        |
| CEU       | 5909   | 7054      | 6460    | 8926   | 2375   | 5596     |       |        |
| Adygei    | 13189  | 13629     | 10668   | 11769  | 9911   | 1970     | 9090  |        |
| Russian   | 10912  | 12513     | 9315    | 11531  | 6798   | 8683     | 11158 | 6667   |

Table S3. Pairwise  $F_{ST}$  between Populations

|             | JPT    | Japanese | Mongola | CHB    | Han<br>N.China | Han    | PanAsia<br>UG | HGDP<br>UG | Basque | Sardinian | Italian | Tuscan | French | Orcadian | CEU  | Adygei |
|-------------|--------|----------|---------|--------|----------------|--------|---------------|------------|--------|-----------|---------|--------|--------|----------|------|--------|
| Japanese    | 0.0003 |          |         |        |                |        |               |            |        |           |         |        |        |          |      |        |
| Mongola     | 0.0083 | 0.0075   |         |        |                |        |               |            |        |           |         |        |        |          |      |        |
| CHB         | 0.0069 | 0.0063   | 0.0050  |        |                |        |               |            |        |           |         |        |        |          |      |        |
| Han-N.China | 0.0070 | 0.0066   | 0.0030  | 0.0007 |                |        |               |            |        |           |         |        |        |          |      |        |
| Han         | 0.0081 | 0.0078   | 0.0075  | 0.0008 | 0.0023         |        |               |            |        |           |         |        |        |          |      |        |
| CN-UG       | 0.0392 | 0.0385   | 0.0240  | 0.0368 | 0.0302         | 0.0383 |               |            |        |           |         |        |        |          |      |        |
| Uygur       | 0.0351 | 0.0340   | 0.0194  | 0.0322 | 0.0266         | 0.0340 | 0.0009        |            |        |           |         |        |        |          |      |        |
| Basque      | 0.1207 | 0.1201   | 0.0997  | 0.1193 | 0.1082         | 0.1190 | 0.0395        | 0.0428     |        |           |         |        |        |          |      |        |
| Sardinian   | 0.1232 | 0.1228   | 0.1035  | 0.1208 | 0.1119         | 0.1216 | 0.0423        | 0.0466     | 0.0134 |           |         |        |        |          |      |        |
| Italian     | 0.1149 | 0.1147   | 0.0953  | 0.1133 | 0.1041         | 0.1142 | 0.0309        | 0.0358     | 0.0076 | 0.0069    |         |        |        |          |      |        |
| Tuscan      | 0.1135 | 0.1156   | 0.0941  | 0.1119 | 0.1046         | 0.1148 | 0.0281        | 0.0334     | 0.0093 | 0.0073    | 0.0011  |        |        |          |      |        |
| French      | 0.1108 | 0.1091   | 0.0900  | 0.1083 | 0.0994         | 0.1086 | 0.0292        | 0.0338     | 0.0070 | 0.0089    | 0.0015  | 0.0024 |        |          |      |        |
| Orcadian    | 0.1175 | 0.1162   | 0.0954  | 0.1137 | 0.1047         | 0.1149 | 0.0328        | 0.0372     | 0.0129 | 0.0170    | 0.0081  | 0.0092 | 0.0051 |          |      |        |
| CEU         | 0.1093 | 0.1075   | 0.0888  | 0.1076 | 0.0977         | 0.1078 | 0.0297        | 0.0338     | 0.0090 | 0.0126    | 0.0037  | 0.0042 | 0.0012 | 0.0048   |      |        |
| Adygei      | 0.1003 | 0.0994   | 0.0790  | 0.0992 | 0.0880         | 0.0991 | 0.0215        | 0.0260     | 0.0181 | 0.0180    | 0.0082  | 0.0070 | 0.0091 | 0.0144   | 0.01 | 0.07   |
| Russian     | 0.0985 | 0.0976   | 0.0769  | 0.0958 | 0.0868         | 0.0969 | 0.0229        | 0.0271     | 0.0143 | 0.0200    | 0.0088  | 0.0090 | 0.0057 | 0.0085   | 0.00 | 0.0116 |

Table S4. Statistics of Principle-Component Analysis in 17 Population Samples with the Use of 19,934 SNPs

| Principle Component | Eigenvalue | Percent Eigenvalue <sup>a</sup> | TW statistic | TW p value              |
|---------------------|------------|---------------------------------|--------------|-------------------------|
| PC1                 | 36.97      | 71.6%                           | 247.096      | 0                       |
| PC2                 | 2.32       | 4.5%                            | 187.364      | 0                       |
| PC3                 | 1.82       | 3.5%                            | 98.895       | $8.09 \times 10^{-287}$ |
| PC4                 | 1.74       | 3.4%                            | 87.799       | $2.95 \times 10^{-240}$ |
| PC5                 | 1.62       | 3.1%                            | 65.712       | $2.93 \times 10^{-156}$ |
| PC6                 | 1.61       | 3.1%                            | 65.005       | $8.97 \times 10^{-154}$ |
| PC7                 | 1.51       | 2.9%                            | 44.966       | $2.72 \times 10^{-89}$  |
| PC8                 | 1.37       | 2.7%                            | 14.804       | $2.32 \times 10^{-18}$  |
| PC9                 | 1.34       | 2.6%                            | 7.041        | $1.22 \times 10^{-7}$   |
| PC10                | 1.33       | 2.6%                            | 6.060        | $1.67 \times 10^{-6}$   |
| PC11                | 1.29       | -                               | -1.900       | 0.697                   |

<sup>a</sup> The percent Eigenvalue is the percentage of the total variance in the first ten PCs.

Table S5 Information of 7999 Validated AIMs

| Chr.  | HapMap SNPs | AIMs I | AIMs II | AIMs III | Start Position | End Position | Total Length |
|-------|-------------|--------|---------|----------|----------------|--------------|--------------|
| 1     | 302715      | 20531  | 4675    | 592      | 0.02           | 300.16       | 300.1        |
| 2     | 321609      | 25745  | 5858    | 650      | 0.22           | 274.13       | 273.9        |
| 3     | 248946      | 19273  | 4482    | 557      | 0.00           | 244.81       | 244.8        |
| 4     | 238779      | 15235  | 3390    | 516      | 1.08           | 232.81       | 231.7        |
| 5     | 242843      | 17171  | 3945    | 510      | 0.07           | 217.12       | 217.1        |
| 6     | 264747      | 17092  | 3733    | 438      | 0.00           | 222.19       | 222.2        |
| 7     | 207602      | 14526  | 3378    | 482      | 0.01           | 197.63       | 197.6        |
| 8     | 208948      | 14448  | 3440    | 369      | 0.01           | 181.33       | 181.3        |
| 9     | 176904      | 12719  | 3061    | 369      | 0.00           | 198.40       | 198.4        |
| 10    | 205964      | 14730  | 3338    | 384      | 0.00           | 183.25       | 183.2        |
| 11    | 201066      | 12470  | 2959    | 350      | 0.04           | 187.41       | 187.4        |
| 12    | 185475      | 13423  | 3080    | 351      | 0.00           | 184.02       | 184.0        |
| 13    | 153534      | 9971   | 2189    | 238      | 0.00           | 138.75       | 138.7        |
| 14    | 120960      | 8563   | 2000    | 230      | 0.03           | 129.94       | 129.9        |
| 15    | 105076      | 9033   | 2292    | 252      | 0.01           | 142.51       | 142.5        |
| 16    | 107586      | 6808   | 1834    | 233      | 0.01           | 134.81       | 134.8        |
| 17    | 87910       | 6090   | 1593    | 238      | 0.01           | 159.42       | 159.4        |
| 18    | 116573      | 6121   | 1539    | 214      | 0.00           | 131.13       | 131.1        |
| 19    | 55273       | 3713   | 1039    | 176      | 0.00           | 117.38       | 117.4        |
| 20    | 117528      | 6440   | 1538    | 217      | 0.84           | 109.45       | 108.6        |
| 21    | 49188       | 2993   | 769     | 135      | 0.16           | 68.11        | 67.9         |
| 22    | 53543       | 3346   | 974     | 164      | 0.56           | 85.03        | 84.5         |
| X     | 115535      | 11466  | 2438    | 334      | 0.04           | 187.71       | 187.7        |
| Total | 3888304     | 271907 | 63544   | 7999     |                |              | 4024.4       |

AIMs I: screened from HapMap data,  $F_{ST} > 0.25$  between CEU and JPT+CHB.

AIMs II: HapMap AIMs genotyped in HGDP-CEPH panel.

AIMs III: final set of AIMs that validated in HGDP-CEPH panel, with the filtering of intermarker distance.

Table S6. Information of 2750 AIMs for Studying PanAsia-UG Only

| Chr.         | AIMs        | Start Position | End Position | Total Length  |
|--------------|-------------|----------------|--------------|---------------|
| 1            | 238         | 8.8            | 287.0        | 278.2         |
| 2            | 268         | 3.3            | 257.6        | 254.3         |
| 3            | 212         | 2.7            | 243.5        | 240.8         |
| 4            | 183         | 14.7           | 230.5        | 215.8         |
| 5            | 205         | 7.2            | 216.0        | 208.8         |
| 6            | 192         | 0.0            | 213.7        | 213.7         |
| 7            | 150         | 4.1            | 196.8        | 192.7         |
| 8            | 135         | 0.0            | 173.9        | 173.9         |
| 9            | 117         | 0.0            | 177.7        | 177.7         |
| 10           | 133         | 2.4            | 177.8        | 175.4         |
| 11           | 96          | 12.6           | 186.0        | 173.4         |
| 12           | 122         | 2.7            | 183.6        | 180.9         |
| 13           | 99          | 1.5            | 138.8        | 137.3         |
| 14           | 77          | 8.0            | 124.5        | 116.5         |
| 15           | 87          | 0.3            | 142.5        | 142.2         |
| 16           | 67          | 15.2           | 128.8        | 113.6         |
| 17           | 53          | 9.0            | 157.8        | 148.8         |
| 18           | 86          | 0.0            | 125.6        | 125.6         |
| 19           | 22          | 0.0            | 104.2        | 104.2         |
| 20           | 53          | 5.9            | 109.4        | 103.5         |
| 21           | 45          | 1.2            | 61.1         | 59.8          |
| 22           | 15          | 21.6           | 74.5         | 52.9          |
| X            | 95          | 0.0            | 180.5        | 180.5         |
| <b>Total</b> | <b>2750</b> |                |              | <b>3770.5</b> |



## Supplemental Reference

1. Li, J.Z., Absher, D.M., Tang, H., Southwick, A.M., Casto, A.M., Ramachandran, S., Cann, H.M., Barsh, G.S., Feldman, M., Cavalli-Sforza, L.L., et al. (2008). Worldwide human relationships inferred from genome-wide patterns of variation. *Science* 319, 1100–1104.
